# Supplementary material for: NEDD4L facilitates granulosa cell ferroptosis by promoting GPX4 ubiquitination and degradation
Source: PubMed Central journal article supplement — Endocr Connect. 2023 Mar 17;12(4):e220459. doi: 10.1530/EC-22-0459 (PMC10083675; doi:10.1530/ec-22-0459), 2023-03-17
Supplement: supplementary_figure_1.pdf [file supplementary_figure_1.pdf]

## Supporting evidences for the interaction of

# E3 (NEDD4L) and substrate (GPX4)

### Short information

|                  |               |
|------------------|---------------|
| E3               | NEDD4L, GSK3B |
| Substrate        | GPX4, P30909  |
| Confidence score | 8.699         |
| Likelihood ratio | 8.92          |

### 1. Excluded domain pair

No supporting evidence

### 2. E3 recognizing motif

| Method                         | E3(s)                       |
|--------------------------------|-----------------------------|
| Inferred E3 recognition motif  | L-SYV                       |
| Essential E3 recognition motif | L-SYV,<br>K-P-N-L,<br>Q-L-L |
| Likelihood ratio               | 2.89                        |
